1 **Genome features of common vetch (*Vicia sativa*) in natural habitats**

2 Running title: **The genome of common vetch**

3

4 Kenta Shirasawa<sup>1\*</sup>, Shunichi Kosugi<sup>1†</sup>, Kazuhiro Sasaki<sup>2‡</sup>, Andrea Ghelfi<sup>1</sup>, Koei Okazaki<sup>1</sup>, Atsushi  
5 Toyoda<sup>3</sup>, Hideki Hirakawa<sup>1</sup>, Sachiko Isobe<sup>1</sup>

6

7 <sup>1</sup>Kazusa DNA Research Institute, Kisarazu, Chiba 292-0818, Japan, <sup>2</sup>Institute for Sustainable  
8 Agro-ecosystem Services, Graduate School of Agricultural and Life Sciences, The University of  
9 Tokyo, Nishitokyo, Tokyo 188-0001, Japan, and <sup>3</sup>National Institute of Genetics, Mishima, Shizuoka  
10 411-8540, Japan

11

12 <sup>†</sup>Present address: RIKEN, Yokohama, Kanagawa 230-0045, Japan

13 <sup>‡</sup>Present address: Japan International Research Center for Agricultural Sciences, Tsukuba, Ibaraki  
14 305-8686, Japan

15

16 \*Corresponding author: Kenta Shirasawa ([shirasaw@kazusa.or.jp](mailto:shirasaw@kazusa.or.jp))

17 Tel. +81-438 52 3935

18

19 **Highlight**

20 Sequence analysis of the common vetch (*Vicia sativa*) genome and SNP genotyping across natural  
21 populations revealed nucleotide diversity levels associated with native population environments.

22

23 **Abstract**

24 Wild plants are often tolerant to biotic and abiotic stresses in their natural environments, whereas  
25 domesticated plants such as crops frequently lack such resilience. This difference is thought to be  
26 due to the high levels of genome heterozygosity in wild plant populations and the low levels of  
27 heterozygosity in domesticated crop species. In this study, common vetch (*Vicia sativa*) was used as  
28 a model to examine this hypothesis. The common vetch genome ( $2n = 14$ ) was estimated as 1.8 Gb  
29 in size. Genome sequencing produced a reference assembly that spanned 1.5 Gb, from which 31,146  
30 genes were predicted. Using this sequence as a reference, 24,118 single nucleotide polymorphisms  
31 were discovered in 1,243 plants from 12 natural common vetch populations in Japan. Common vetch  
32 genomes exhibited high heterozygosity at the population level, with lower levels of heterozygosity  
33 observed at specific genome regions. Such patterns of heterozygosity are thought to be essential for  
34 adaptation to different environments. These findings suggest that high heterozygosity at the  
35 population level would be required for wild plants to survive under natural conditions while allowing  
36 important gene loci to be fixed to adapt the conditions. The resources generated in this study will  
37 provide insights into *de novo* domestication of wild plants and agricultural enhancement.

38

39 **Keywords:** Common vetch; ddRAD-Seq; Genome sequence; Natural populations; Nucleotide  
40 diversity; Single nucleotide polymorphism

41

## 42 **Introduction**

43 Wild plants, including weeds that have not yet been domesticated or cultivated, generally possess  
44 characteristics that allow them to survive and propagate in their natural environments when  
45 challenged by local biotic and abiotic stresses (Mammadov *et al.*, 2018). The resilience exhibited by  
46 wild plants is thought to be due to their high levels of genetic heterogeneity (Canciano, 2011).  
47 Indeed, genetic heterogeneity was effective in suppressing disease when populations of genetically  
48 diversified crops were planted together in the same fields (Zhu *et al.*, 2000).

49 In contrast with wild plants, crop plants have lost their natural survival traits as a result of the  
50 extremely low levels of genetic heterogeneity found in monoculture crop species (Mundt, 2002).  
51 Therefore, disease-, insect-, and weed-controls are essential in commercial crop cultivation to reduce  
52 losses and maximize yields. This requires additional crop management costs for farmers, for example,  
53 for labor and agrochemicals. There are two main reasons for the low genetic heterogeneity in crop  
54 species. One reason is crop domestication (Izawa *et al.*, 2009), in which only a few plants possessing  
55 desirable phenotypes, such as large fruit size, non-seed shattering, and long-seed dormancy, are  
56 selected from the broad genetic pools of wild plants. The second reason is selective breeding for  
57 desirable traits. While valuable for stabilizing crop phenotypes such as yield, these selective  
58 processes have reduced genetic diversity in monoculture crops by purging diverse germplasms (Fu,  
59 2015). During domestication and selective breeding, small numbers of alleles that have large effects  
60 on phenotypic variations have often been targeted, further reducing the genetic diversity within  
61 cultivated varieties (Fernie and Yan, 2019).

62 While remaining more diverse than crop species, wild plant populations have also experienced  
63 loss of genetic heterogeneity at some loci, though in wild plants this is due to directional selection  
64 and genetic drift. For example, natural populations of *Arabidopsis* have lost genetic heterogeneity at  
65 flowering loci to synchronize flowering time (Mendez-Vigo *et al.*, 2011), which is beneficial for  
66 propagation under natural conditions. This suggests that genome-wide genetic heterogeneity is not  
67 necessarily required for wild plant populations and that small numbers of loci could become fixed

68 under certain selective conditions. This suggests that it would be possible to generate new plant  
69 populations with a) fixed domestication loci with suitable alleles for agricultural traits and b) high  
70 general levels of genetic diversity elsewhere in the genome. Such plant populations could be used as  
71 crop species, as proposed by Litrico and Violle (Litrico and Violle, 2015), and would possess natural  
72 resistance and suppression traits, as a result of high heterogeneity, that would enhance population  
73 resilience to biotic and abiotic stresses. As favorable agricultural alleles would be fixed, the benefits  
74 of genetic heterogeneity would exist alongside desirable agricultural traits. Mixtures of heterozygous  
75 plant populations have already been used as crops in allogamous species such as onion and clover.  
76 However, the potential benefits of genetic heterogeneity for autogamous plants such as legumes  
77 remain unclear.

78 Common vetch (*Vicia sativa*), a wild legume commonly found in open fields, was partially  
79 domesticated and cultivated in the past (Bryant and Hughes, 2011). Common vetch therefore has  
80 crop potential and can serve as a model for examination of genetic heterogeneity and domestication.  
81 The first step is to evaluate the levels of genetic heterogeneity in wild common vetch populations.  
82 However, no genome sequence data is available in common vetch. At least three different  
83 chromosome numbers ( $2n = 10, 12, \text{ and } 14$ ) have been reported (Ladizinsky, 1998; Ladizinsky and  
84 Waines, 1982). In this study, a reference sequence for common vetch was developed and single  
85 nucleotide polymorphism (SNP) analysis with double-digest restriction-site associated DNA  
86 sequencing (ddRAD-Seq) was used to evaluate heterogeneity in genomes of common vetch  
87 populations.

88

## 89 **Materials and methods**

### 90 *Plant materials*

91 A standard inbred line of common vetch (*V. sativa*), KSR5, was established from a wild plant  
92 collected from Kisarazu, Chiba, Japan, by self-pollination for more than three generations. KSR5  
93 was used for genome and transcriptome sequencing analysis. For genetic diversity analysis, 1,243

94 plants were collected from 12 locations across the latitude from 31.3°N to 38.8°N in Japan (Figure 1,  
95 Supplementary Table S1). In addition, eight accessions from France, Germany, Greece, Iran, Italy,  
96 and Tunisia were obtained from the NIAS Genebank, Tsukuba, Japan (Supplementary Table S1).  
97 Genomic DNA was extracted from young leaves with a DNeasy Plant Mini Kit (Qiagen, Hilden,  
98 Germany).

99

#### 100 *Chromosome observation*

101 Root tips of two-day-old seedlings of KSR5 were treated with 0.05% colchicine for 18 hours, fixed  
102 with 1:3 acetate:ethanol for 2 hours, and washed three times with water. Cell walls of the root tips  
103 were digested with 2% cellulase (SERVA Electrophoresis GmbH, Heidelberg, Germany), 2%  
104 macerozyme (SERVA Electrophoresis GmbH), and 0.1 M sodium acetate for four hours at 37°C.  
105 The root tip cells spread on a slide glass were fixed again with 1:3 acetate:ethanol and dried at room  
106 temperature. Chromosomes were stained with 1 ug/mL DAPI (4,6-Diamidino-2-phenylindole) in  
107 Fluoro-KEEPER Antifade Reagent (Nacalai Tesque, Kyoto, Japan) and were observed under a  
108 confocal laser scanning microscope, LSM700 (Carl Zeiss, Oberkochen, Germany). Chromosome  
109 length was measured with ImageJ (Schneider *et al.*, 2012).

110

#### 111 *Sequencing analysis of the common vetch genome*

112 Genomic DNA from KSR5 was used to construct one paired-end (insert size of 500 bp) and four  
113 mate-pair sequencing libraries (insert sizes of 2, 5, 10, and 15 kb) in accordance with manufacturer  
114 protocols (Illumina, San Diego, CA, USA). Libraries were then sequenced using a HiSeq2000  
115 instrument (Illumina). A long insert library for KSR5 was also prepared and sequenced on an RSII  
116 instrument (PacBio, Menlo Park, CA, USA). The paired-end sequence reads were used for genomic  
117 size estimation based on *k*-mer frequency ( $k = 17$ ) using Jellyfish (Marcais and Kingsford, 2011).  
118 The paired-end and mate-pair reads were assembled and scaffolded with SOAPdenovo2 (Luo *et al.*,  
119 2012). Gaps, represented by Ns in the scaffold sequences, were filled by PBjelly (English *et al.*,

120 2012) with PacBio reads, in which sequence errors were corrected with the paired-end reads by  
121 proovread (Hackl *et al.*, 2014). Contaminated sequences were removed by BLASTN search  
122 (Altschul *et al.*, 1990), with an E-value cutoff of 1E-10 and length coverage of  $\geq 10\%$ , against  
123 sequences from potential contaminating resources such as organelles (the plastid and mitochondrion  
124 genome sequences of *L. japonicus* and *V. faba*: KF042344, AP002983, JN872551, and KC189947),  
125 bacteria and fungi (NCBI bacteria and fungi), human (hg19), and artificial sequences (UniVec and  
126 PhiX). The resulting sequences that were  $\geq 1,000$  bp in size were selected and designated VSA\_r1.0  
127 as a draft common vetch genome. Completeness of the assembly was assessed with sets of a  
128 Benchmarking Universal Single-Copy Orthologs (BUSCO) (Simao *et al.*, 2015).

129

### 130 *RNA sequencing and assembly*

131 Total RNA was extracted from ten tissue samples (roots, seedlings, stems, apical buds, immature and  
132 mature leaves, tendrils, flower buds, flowers, and pods) using an RNeasy Mini Kit (Qiagen) and  
133 treated with RQ1 RNase-Free DNase (Promega, Madison, WI, USA) to remove contaminating  
134 genomic DNA. RNA libraries were constructed in accordance with the TruSeq Stranded mRNA  
135 Sample Preparation Guide (Illumina). Nucleotide sequences were obtained with a MiSeq instrument  
136 (Illumina) in the paired-end 301 bp mode. Low-quality reads were removed using PRINSEQ  
137 (Schmieder and Edwards, 2011) and adapter sequences were trimmed with fastx\_clipper (parameter,  
138 -a AGATCGGAAGAGC) in the FASTX-Toolkit ([http://hannonlab.cshl.edu/fastx\\_toolkit](http://hannonlab.cshl.edu/fastx_toolkit)). The  
139 resulting reads were assembled using Trinity (Grabherr *et al.*, 2011) with parameters of  
140 `--min_contig_length 100, --group_pairs_distance 400, and --SS_lib_type RF` to generate a  
141 non-redundant gene sequence set.

142

### 143 *Repetitive sequence and RNA coding gene analysis*

144 A *de novo* repeat sequence database for VSA\_r1.0 was built using RepeatScout (Price *et al.*, 2005)  
145 (version 1.0.5). Repetitive sequences in VSA\_r1.0 were searched for using RepeatMasker (version

146 4.0.3) (<http://www.repeatmasker.org>) based on known repetitive sequences registered in Repbase  
147 (Bao *et al.*, 2015) and the *de novo* repeat libraries. Transfer RNA genes were predicted using  
148 tRNAscan-SE (version 1.23) (Chan and Lowe, 2019) with the default parameters, and ribosomal  
149 RNA (rRNA) genes were predicted using BLASTN searches with an E-value cutoff of 1E-10, with  
150 the *Arabidopsis thaliana* 18S rRNA (accession number: X16077) and 5.8S and 25S rRNAs  
151 (accession number: X52320) used as query sequences.

152

### 153 *Protein-coding gene prediction and annotation*

154 Putative protein-coding genes in VSA\_r1.0 were identified with a MAKER pipeline (version 2.31.8)  
155 (Cantarel *et al.*, 2008) including *ab-initio*-, evidence-, and homology-based gene prediction methods.  
156 For this prediction, the non-redundant gene sequence set generated from the RNA-Seq analysis and  
157 peptide sequences predicted in the genomes of four Fabaceae members, namely, *Arachis duranensis*  
158 (V14167.a1.M1) (Bertioli *et al.*, 2016), *Lotus japonicus* (rel. 3.0) (Sato *et al.*, 2008), *Medicago*  
159 *truncatula* (4.0v1) (Young *et al.*, 2011), and *Phaseolus vulgaris* (v1.0) (Schmutz *et al.*, 2014), were  
160 used as a training data set. In addition, BRAKER1 (version 1.3) (Hoff *et al.*, 2016) was used to  
161 complete the gene set for VSA\_r1.0. Genes related to transposable elements (TEs) were detected  
162 using BLASTP searches against the NCBI non-redundant (nr) protein database with an E-value  
163 cutoff of 1E-10 and by using InterProScan (version 4.8) (Jones *et al.*, 2014) searches against the  
164 InterPro database with an E-value cutoff of 1.0.

165 Putative VSA\_r1.0 genes were clustered using CD-hit (version 4.6.1) (Li and Godzik, 2006)  
166 with the UniGene set of the four Fabaceae members as above with the parameters  $c = 0.6$  and  $aL$   
167  $= 0.4$ . The predicted genes were annotated with plant gene ontology (GO) slim categories and  
168 euKaryotic clusters of Orthologous Groups (KOG) categories (Tatusov *et al.*, 2003), and mapped  
169 onto the Kyoto Encyclopedia of Genes and Genomes (KEGG) reference pathways (Ogata *et al.*,  
170 1999).

171 Gene expression was quantified by mapping the RNA-Seq reads onto VSA\_r1.0 using HISAT2  
172 (Kim *et al.*, 2015) followed by normalization to determine fragments per kilobase of exon per  
173 million mapped fragments (FPKM) values using StringTie (Pertea *et al.*, 2015) and Ballgown  
174 (Frazee *et al.*, 2015) in accordance with the published protocol (Pertea *et al.*, 2016).

175

#### 176 *Genetic diversity analysis*

177 Genome-wide sequence variations in wild vetch populations were analyzed by a double-digest  
178 restriction-site associated DNA sequencing (ddRAD-Seq) technique (Peterson *et al.*, 2012). In  
179 accordance with the workflow established in our previous study (Shirasawa *et al.*, 2016), genomic  
180 DNA samples from each line were digested with the restriction enzymes *Pst*I and *Eco*RI to prepare  
181 ddRAD-Seq libraries, which were then sequenced on a HiSeq2000 (Illumina) instrument in  
182 paired-end 93 bp mode. Low-quality sequences were removed and adapters were trimmed using  
183 PRINSEQ (Schmieder and Edwards, 2011) and fastx\_clipper in the FASTX-Toolkit  
184 ([http://hannonlab.cshl.edu/fastx\\_toolkit](http://hannonlab.cshl.edu/fastx_toolkit)), respectively. The remaining high-quality reads were  
185 mapped onto VSA\_r1.0 as a reference using Bowtie2 (Langmead and Salzberg, 2012). The resultant  
186 sequence alignment-map format (SAM) files were converted to binary sequence alignment-map  
187 format (BAM) files and subjected to SNP calling using the mpileup option of SAMtools (Li *et al.*,  
188 2009) and the view option of BCFtools. High-confidence SNPs were selected using VCFtools  
189 (Danecek *et al.*, 2011) with the following criteria: (1) depth of coverage  $\geq 5$  for each line, (2) SNP  
190 quality scores of 999 for each locus, (3) minor allele frequency  $\geq 0.05$  for each locus, and (4)  
191 proportion of missing data  $< 0.5$  for each locus. The effects of SNPs on gene function were predicted  
192 using SnpEff v4.2 (Cingolani *et al.*, 2012).

193 Nucleotide divergency ( $\pi$ ) values and heterozygosity levels for SNP sites of each population  
194 were calculated using the site-pi and het options in VCFtools (Danecek *et al.*, 2011), respectively.  
195 Principal component analysis (PCA) was performed to determine the relationships among samples  
196 using TASSEL (Bradbury *et al.*, 2007) and population structure was investigated using



197 ADMIXTURE (Alexander *et al.*, 2009). The R package WGCNA (Langfelder and Horvath, 2008)  
198 was used for SNP module detection.

199

## 200 **Results**

### 201 *Chromosome number of a common vetch line, KSR5*

202 A total of 14 chromosomes, including two mini chromosomes, were observed in metaphase cells of  
203 root tips of the standard inbred line, KSR5 (Figure 2, Table 1). Relative length of the chromosomes  
204 was measured in five cells and sorted by the length order. In accordance with the chromosome length,  
205 the 14 chromosomes were grouped into seven pairs (I to VII), suggesting that the genome of KSR5  
206 was  $2n = 14$ . The relative length of the longest chromosome (I) was 22.3% of the total length of  
207 haploid genome, followed by 21.0% (II), 18.6% (III), 16.1% (IV), 10.3% (V), 9.3% (VI), and 2.7%  
208 (VII).

209

### 210 *Sequencing and genome assembly*

211 The standard inbred line of common vetch (*V. sativa*), KSR5, was sequenced. In total, 1.8 billion  
212 paired-end reads corresponding to 186.7 Gb (Supplementary Table S2) were obtained. The  
213 distribution of distinct *k*-mers ( $k = 17$ ) showed a single main peak at multiplicities of 78 with minor  
214 peaks (Figure 3). The size of the common vetch genome was estimated to be 1,769 Mb. The  
215 paired-end reads (105× genome coverage) were assembled with mate-pair reads of four libraries  
216 (146× genome coverage in total) to obtain 6,487 thousand (k) scaffold sequences of total length 2.5  
217 Gb with an N50 of 30.5 kb. After removing 6,421 k contaminated sequences and short scaffolds (<1  
218 kb), sequence gaps presented by Ns in the remaining sequences were filled with PacBio long reads  
219 (3× genome coverage) to obtain a draft sequence of the common vetch genome, namely, VSA\_r1.0.  
220 The total length of VSA\_r1.0 was 1,541 Mb and consisted of 54,083 sequences with an N50 of 90.1  
221 kb (Table 2). Although 513 k gaps occupied 501 Mb in total (32.5%), the gene space was well  
222 represented in accordance with BUSCO examination, indicating 94.1% ortholog completion.

223

#### 224 *Repeat sequence analysis*

225 Sequences totaling 782 Mb (51.9%) were identified as repeat elements such as transposons and  
226 retrotransposons (Table 3). Of this, sequences totaling 267 Mb were repeat sequences reported in  
227 other organisms, and sequences in the remaining 531 Mb were uniquely identified in VSA\_r1.0. Of  
228 the previously reported repeats, long terminal repeat retroelements were predominant (200 Mb).  
229 Furthermore, 109,151 simple-sequence repeats with 52,874 di-, 39,198 tri-, 12,354 tetra-, 3,414  
230 penta-, and 1,311 hexa-nucleotide repeat motifs were also found.

231

#### 232 *Gene prediction and annotation*

233 In total, 31,146 protein-encoding genes, with average length of 1,008 bp and N50 of 1,419 bp, were  
234 predicted in VSA\_r1.0 (Table 2). For the evidence-based MAKER pipeline, 166 million (M) RNA  
235 reads from ten tissue samples (Supplementary Table S2) were assembled into 181,211 transcribed  
236 sequences and used to predict 27,880 genes (genes with .mk suffix). A further 3,266 genes were  
237 predicted using an *ab-initio*-based method (genes with .br suffix). GO classification assigned 8,878,  
238 4,059, and 13,752 genes to the GO slim terms of biological process, cellular component, and  
239 molecular function, respectively (Supplementary Table S3). KOG analysis revealed 2,766, 4,888,  
240 and 4,424 genes with significant similarities to genes involved in information storage and processing,  
241 cellular processing and signaling, and metabolism, respectively (Supplementary Table S4). Finally,  
242 1,720 genes were mapped to KEGG metabolic pathways (Supplementary Table S5). Gene clustering  
243 analysis revealed 5,566 gene clusters that were common to the five legume species tested (*V. sativa*,  
244 *A. duranensis*, *L. japonicus*, *M. truncatula*, and *P. vulgaris*) and 12,321 clusters that were unique to  
245 common vetch (Figure 4). In addition to mRNA sequences, 58 rRNA- and 1,437 tRNA-encoding  
246 genes were predicted.

247

#### 248 *Single nucleotide polymorphisms in natural populations*

249 Genome-wide SNPs were identified across the 12 common vetch populations from Japan, consisting  
250 of 1,243 lines, and eight lines from France, Germany, Greece, Iran, Italy, and Tunisia from the  
251 NARO GeneBank (Tsukuba, Japan) (Supplementary Table S1). Approximately 1.1 million  
252 ddRAD-Seq reads per sample were obtained (Supplementary Table S2) and 84.4% of the reads  
253 aligned to the VSA\_r1.0 reference sequence. The ddRAD-Seq reads covered 2.4 Mb (0.16%) of the  
254 reference assembly with  $\geq 5$  reads. Sequence alignments detected 46,715 high-confidence SNPs  
255 (30.9% transitions and 69.1% transversions). SNP density was calculated as 1 SNP per 51 bp. When  
256 only the 12 populations from Japan were considered, the number of SNPs decreased to 24,118 (1  
257 SNP per 100 bp), ranging from 4,709 SNPs in the SDI population (1 SNP per 510 bp) to 10,040  
258 SNPs in the ABK population (1 SNP per 239 bp) (Table 4).

259 PCA and admixture analysis indicated that there were 2–11 subpopulations in each of the 12  
260 populations from Japan (Figure 5, Table 3, Supplementary Figures S1). The observed heterozygosity  
261 scores were lower than the expected values (Table 4). Nucleotide divergency scores ( $\pi$ ) at SNP sites  
262 were similarly distributed across ten of the populations from Japan, with median values of 0.31–0.34.  
263 The remaining two populations, NGT and SDI, exhibited median values of  $\sim 0.25$  (Table 4). Of the  
264 46,715 high-confidence SNPs, 24,118 clustered according to their  $\pi$  scores to generate 82 modules  
265 (Supplementary Figure S2). Of these, the  $\pi$  scores of one cluster, ‘cyan’, which contained 190 SNPs,  
266 negatively correlated with the latitude of sampling location (Figure 1 and 6). In total, 88 genes were  
267 associated with the 190 SNPs, and one of the genes (Vsa\_sc30698.1\_g030.1.mk) showed sequence  
268 similarity to the Arabidopsis gene for a MADS-box protein, SUPPRESSOR OF  
269 OVEREXPRESSION OF CONSTANS1 (SOC1), known to be involved in the flowering pathway in  
270 plants. Vsa\_sc30698.1\_g030.1.mk was predominantly transcribed in tendrils (FPKM = 5.0) followed  
271 by apical buds (0.5) and stems (0.4), whereas no expression was observed in the other seven tissues,  
272 i.e., roots, seedlings, immature and mature leaves, flower buds, flowers, and pods.

273

274 **Discussion**

275 A draft common vetch (*V. sativa*) genome sequence was generated in this study. Although several  
276 legume genome sequences were released previously (Bauchet *et al.*, 2019), this is the first report of a  
277 genome from the genus *Vicia*, which contains several agronomically important legume crops such as  
278 fava bean (*V. faba*). *Vicia* genomes are large (e.g., 1.8 Gb for *V. sativa* and 13 Gb for *V. faba*) due to  
279 their massive repetitive sequences, including TEs (Bryant and Hughes, 2011; Hill *et al.*, 2005;  
280 Nouzova *et al.*, 2001; Pearce *et al.*, 1996), hampering *de novo* genome assembly in this genus  
281 (Bauchet *et al.*, 2019). As might therefore be expected, more than half of the *V. sativa* genome  
282 assembly was comprised of repetitive sequences (Table 3). The assembly contained up to 54,083  
283 contig sequences and included 513 k gaps occupying >500 Mb (Table 2). The short-read technology  
284 employed for sequencing might therefore be insufficient to span the repeats. Although construction  
285 of contiguous sequences from the short reads was challenging, a near complete gene set was  
286 successfully identified in the assembly (Table 2). Whereas it was impossible to compare the genome  
287 structure of common vetch with those of relatives due to the fragmented genome sequences,  
288 clustering analysis of the gene sequences would provide insights into the gene homoeology in  
289 legume species (Figure 4). The genome resources developed in this study will be invaluable for  
290 forthcoming gene discovery studies, such as transcriptome analysis and allele mining, in *Vicia*.

291 We reproducibly observed seven pairs of chromosomes (I to VII) in the root-tip cells of KSR5  
292 (Figure 2), among of which one pair (VII) was so small occupying only 2.7% of the total length of  
293 the seven chromosome pairs (Table 1). One type of mini chromosomes, so called B chromosomes  
294 which are comprised of repetitive sequence, have been reported in numerous groups of plants so far,  
295 but the biological function has not been known (Houben, 2017). B chromosomes are not necessary  
296 for the growth and normal development of organisms and show non-Mendelian inheritance patterns  
297 (Houben, 2017). This could be one of the reasons for the different chromosome numbers in *Vicia*  
298 *sativa* (Ladizinsky, 1998; Ladizinsky and Waines, 1982; Navratilova *et al.*, 2003). Further  
299 chromosome observations and fluorescence in situ hybridization with the repetitive sequences as  
300 probes across multiple lines would characterize and identify the mini chromosomes observed in this

301 study. Alternatively, sterility of F1 hybrids derived from crosses between plants with different  
302 chromosome numbers should be analyzed to gain insights into the function of the small  
303 chromosomes.

304 Twelve common vetch populations from Japan were examined, each of which contained 2–11  
305 subpopulations (Figure 5, Table 4, Supplementary Figures S4). This suggested that the numbers of  
306 founder plants were limited even in populations grown under natural environmental conditions.  
307 Heterozygosity is thought to contribute strongly to the survival of plant populations under natural  
308 conditions (Canciano, 2011). Here, the observed heterozygosity was lower than expected (Table 4),  
309 indicating that heterozygosity in common vetch populations was high at the population level but low  
310 at the individual level due to self-pollination. This suggested that high heterozygosity at the  
311 population level is sufficient to allow adaptation and survival under natural conditions in autogamous  
312 common vetch.

313 Human domestication of wild plant species for agriculture involved selection of individual  
314 plants with desirable traits (Izawa *et al.*, 2009; Vaughan *et al.*, 2007). More recently, elite cultivars  
315 have been developed with enhanced yield performance to satisfy global food requirements (Hickey  
316 *et al.*, 2019). The successive selection of small numbers of individual plants during these processes  
317 produced severe bottleneck effects and resulted in decreased genetic diversity and lower tolerance to  
318 biotic and abiotic stresses (Canciano, 2011). Heterozygosity at specific genome regions was also  
319 lost in some wild plants (Figure 6), as reported previously (Mendez-Vigo *et al.*, 2011). This  
320 suggested that genome-wide genetic heterogeneity is not necessarily required for plants to survive  
321 under natural conditions. Recent studies have proposed *de novo*-, super-, or neo-domestication  
322 (Fernie and Yan, 2019; Hickey *et al.*, 2019; Vaughan *et al.*, 2007), whereby genetic loci for  
323 agronomically important traits are introduced to cultivated crop varieties from wild plants. However,  
324 the high genetic heterozygosity levels from the wild donor plants should be retained during the  
325 development of new crops to avoid the bottleneck effects sustained during historic domestication of  
326 crop varieties (Litrice and Violle, 2015). Therefore, we propose that new domestication of wild

327 plants should retain high heterozygosity at the population level to capitalize on beneficial traits that  
328 increase tolerance to abiotic and biotic stresses, but that agronomically important genetic loci should  
329 be fixed to maximize crop potential. The resources generated in this study will provide insights into  
330 the *de novo* domestication of wild plants to develop enhanced crop varieties.

331

### 332 **Supplementary Data**

333 **Supplementary Table S1** Plant materials.

334 **Supplementary Table S2** Genome and transcriptome data.

335 **Supplementary Table S3** Number of KOG functions for protein-encoding genes.

336 **Supplementary Table S4** Number of genes mapped to KEGG pathways.

337 **Supplementary Table S5** Number of GO terms for protein-encoding genes.

338 **Supplementary Figure S1** Cross-validation errors for 12 natural populations of *Vicia sativa* from  
339 Japan in admixture analysis.

340 **Supplementary Figure S2** Nucleotide diversity of SNP modules across 12 natural populations of  
341 *Vicia sativa* from Japan.

342

### 343 **Acknowledgments**

344 We are grateful to Dr. H. Masumoto (Kazusa DNA Research Institute) for his kind support. We  
345 thank T. Fujishiro, K. Kawashima, Y. Kishida, M. Kohara, C. Minami, S. Nakayama, K. Nanri, S.  
346 Sasamoto, C. Takahashi, H. Tsuruoka, A. Watanabe, and M. Yamada (Kazusa DNA Research  
347 Institute) and staff of the Department of Technical Development at the Institute for Sustainable  
348 Agro-ecosystem Services (University of Tokyo) for their technical assistance. Plant materials were  
349 provided by the NIAS GeneBank (Tsukuba, Japan). This work was supported by KAKENHI  
350 (24710237 and 221S0002) and the Kazusa DNA Research Institute Foundation.

351

### 352 **Data Availability**

353 Sequence data are available from the Sequence Read Archive (DRA) of DNA Data Bank of Japan  
354 (DDBJ) under accession numbers DRA004347 for whole genome sequencing, DRA004313 for  
355 RNA-Seq, and DRA004301-DRA004312 for ddRAD-Seq (Supplementary Table S2). The DDBJ  
356 accession numbers of the assembled sequences are BLWO01000001-BLWO01054083. Genome  
357 information is available at Plant GARDEN (<https://plantgarden.jp>).  
358

359 **References**

- 360 **Alexander DH, Novembre J, Lange K.** 2009. Fast model-based estimation of ancestry in unrelated  
361 individuals. *Genome Res* **19**, 1655-1664.
- 362 **Altschul SF, Gish W, Miller W, Myers EW, Lipman DJ.** 1990. Basic local alignment search tool.  
363 *J Mol Biol* **215**, 403-410.
- 364 **Bao W, Kojima KK, Kohany O.** 2015. Repbase Update, a database of repetitive elements in  
365 eukaryotic genomes. *Mob DNA* **6**, 11.
- 366 **Bauchet GJ, Bett KE, Cameron CT, Campbell JD, Cannon EKS, Cannon SB, Carlson JW,**  
367 **Chan A, Cleary A, Close TJ, Cook DR, Cooksey AM, Coyne C, Dash S, Dickstein R, Farmer**  
368 **AD, Fernández-Baca D, Hokin S, Jones ES, Kang Y, Monteros MJ, Muñoz-Amatriaín M,**  
369 **Mysore KS, Pislariu CI, Richards C, Shi A, Town CD, Udvardi M, Wettberg EB, Young ND,**  
370 **Zhao PX.** 2019. The future of legume genetic data resources: Challenges, opportunities, and  
371 priorities. *Legume Science* **1**.
- 372 **Bertioli DJ, Cannon SB, Froenicke L, Huang G, Farmer AD, Cannon EK, Liu X, Gao D,**  
373 **Clevenger J, Dash S, Ren L, Moretzsohn MC, Shirasawa K, Huang W, Vidigal B, Abernathy B,**  
374 **Chu Y, Niederhuth CE, Umale P, Araujo AC, Kozik A, Kim KD, Burow MD, Varshney RK,**  
375 **Wang X, Zhang X, Barkley N, Guimaraes PM, Isobe S, Guo B, Liao B, Stalker HT, Schmitz**  
376 **RJ, Scheffler BE, Leal-Bertioli SC, Xun X, Jackson SA, Michelmore R, Ozias-Akins P.** 2016.  
377 The genome sequences of *Arachis duranensis* and *Arachis ipaensis*, the diploid ancestors of  
378 cultivated peanut. *Nat Genet* **48**, 438-446.
- 379 **Bradbury PJ, Zhang Z, Kroon DE, Casstevens TM, Ramdoss Y, Buckler ES.** 2007. TASSEL:  
380 software for association mapping of complex traits in diverse samples. *Bioinformatics* **23**,  
381 2633-2635.
- 382 **Bryant JA, Hughes SG.** 2011. Vicia. In: Kole C, ed. *Wild Crop Relatives: Genomic and Breeding*  
383 *Resources*. Berlin Heidelberg: Springer-Verlag, 273-289.
- 384 **Cancado G.** 2011. The Importance of Genetic Diversity to Manage Abiotic Stress. In: Shanker A,  
385 ed. *Abiotic Stress in Plants - Mechanisms and Adaptations*: InTech, 351-366.
- 386 **Cantarel BL, Korf I, Robb SM, Parra G, Ross E, Moore B, Holt C, Sanchez Alvarado A,**  
387 **Yandell M.** 2008. MAKER: an easy-to-use annotation pipeline designed for emerging model  
388 organism genomes. *Genome Res* **18**, 188-196.
- 389 **Chan PP, Lowe TM.** 2019. tRNAscan-SE: Searching for tRNA Genes in Genomic Sequences.  
390 *Methods Mol Biol* **1962**, 1-14.
- 391 **Cingolani P, Platts A, Wang le L, Coon M, Nguyen T, Wang L, Land SJ, Lu X, Ruden DM.**  
392 2012. A program for annotating and predicting the effects of single nucleotide polymorphisms,  
393 SnpEff: SNPs in the genome of *Drosophila melanogaster* strain w1118; iso-2; iso-3. *Fly (Austin)* **6**,  
394 80-92.



395 **Danecek P, Auton A, Abecasis G, Albers CA, Banks E, DePristo MA, Handsaker RE, Lunter G,**  
396 **Marth GT, Sherry ST, McVean G, Durbin R, Genomes Project Analysis G.** 2011. The variant  
397 call format and VCFtools. *Bioinformatics* **27**, 2156-2158.  
398 **English AC, Richards S, Han Y, Wang M, Vee V, Qu J, Qin X, Muzny DM, Reid JG, Worley**  
399 **KC, Gibbs RA.** 2012. Mind the gap: upgrading genomes with Pacific Biosciences RS long-read  
400 sequencing technology. *PLoS One* **7**, e47768.  
401 **Fernie AR, Yan J.** 2019. De Novo Domestication: An Alternative Route toward New Crops for the  
402 Future. *Mol Plant* **12**, 615-631.  
403 **Frazer AC, Perteza G, Jaffe AE, Langmead B, Salzberg SL, Leek JT.** 2015. Ballgown bridges the  
404 gap between transcriptome assembly and expression analysis. *Nat Biotechnol* **33**, 243-246.  
405 **Fu YB.** 2015. Understanding crop genetic diversity under modern plant breeding. *Theor Appl Genet*  
406 **128**, 2131-2142.  
407 **Grabherr MG, Haas BJ, Yassour M, Levin JZ, Thompson DA, Amit I, Adiconis X, Fan L,**  
408 **Raychowdhury R, Zeng Q, Chen Z, Mauceli E, Hacohen N, Gnirke A, Rhind N, di Palma F,**  
409 **Birren BW, Nusbaum C, Lindblad-Toh K, Friedman N, Regev A.** 2011. Full-length  
410 transcriptome assembly from RNA-Seq data without a reference genome. *Nat Biotechnol* **29**,  
411 644-652.  
412 **Hackl T, Hedrich R, Schultz J, Forster F.** 2014. proofread: large-scale high-accuracy PacBio  
413 correction through iterative short read consensus. *Bioinformatics* **30**, 3004-3011.  
414 **Hickey LT, A NH, Robinson H, Jackson SA, Leal-Bertioli SCM, Tester M, Gao C, Godwin ID,**  
415 **Hayes BJ, Wulff BBH.** 2019. Breeding crops to feed 10 billion. *Nat Biotechnol* **37**, 744-754.  
416 **Hill P, Burford D, Martin DM, Flavell AJ.** 2005. Retrotransposon populations of *Vicia* species  
417 with varying genome size. *Mol Genet Genomics* **273**, 371-381.  
418 **Hoff KJ, Lange S, Lomsadze A, Borodovsky M, Stanke M.** 2016. BRAKER1: Unsupervised  
419 RNA-Seq-Based Genome Annotation with GeneMark-ET and AUGUSTUS. *Bioinformatics* **32**,  
420 767-769.  
421 **Houben A.** 2017. B Chromosomes - A Matter of Chromosome Drive. *Front Plant Sci* **8**, 210.  
422 **Izawa T, Konishi S, Shomura A, Yano M.** 2009. DNA changes tell us about rice domestication.  
423 *Curr Opin Plant Biol* **12**, 185-192.  
424 **Jones P, Binns D, Chang HY, Fraser M, Li W, McAnulla C, McWilliam H, Maslen J, Mitchell**  
425 **A, Nuka G, Pesseat S, Quinn AF, Sangrador-Vegas A, Scheremetjew M, Yong SY, Lopez R,**  
426 **Hunter S.** 2014. InterProScan 5: genome-scale protein function classification. *Bioinformatics* **30**,  
427 1236-1240.  
428 **Kim D, Langmead B, Salzberg SL.** 2015. HISAT: a fast spliced aligner with low memory  
429 requirements. *Nat Methods* **12**, 357-360.  
430 **Ladizinsky G.** 1998. *Plant Evolution under Domestication*. Netherlands: Kluwer Academic  
431 Publishers.

- 432 **Ladizinsky G, Waines G.** 1982. Seed protein polymorphism in *Vicia sativa* agg. (Fabaceae). *Plant*  
433 *Systematics and Evolution* **141**, 1-5.
- 434 **Langfelder P, Horvath S.** 2008. WGCNA: an R package for weighted correlation network analysis.  
435 *BMC Bioinformatics* **9**, 559.
- 436 **Langmead B, Salzberg SL.** 2012. Fast gapped-read alignment with Bowtie 2. *Nat Methods* **9**,  
437 357-359.
- 438 **Li H, Handsaker B, Wysoker A, Fennell T, Ruan J, Homer N, Marth G, Abecasis G, Durbin R,**  
439 **Genome Project Data Processing S.** 2009. The Sequence Alignment/Map format and SAMtools.  
440 *Bioinformatics* **25**, 2078-2079.
- 441 **Li W, Godzik A.** 2006. Cd-hit: a fast program for clustering and comparing large sets of protein or  
442 nucleotide sequences. *Bioinformatics* **22**, 1658-1659.
- 443 **Litrico I, Violle C.** 2015. Diversity in Plant Breeding: A New Conceptual Framework. *Trends Plant*  
444 *Sci* **20**, 604-613.
- 445 **Luo R, Liu B, Xie Y, Li Z, Huang W, Yuan J, He G, Chen Y, Pan Q, Liu Y, Tang J, Wu G,**  
446 **Zhang H, Shi Y, Liu Y, Yu C, Wang B, Lu Y, Han C, Cheung DW, Yiu SM, Peng S, Xiaoqian**  
447 **Z, Liu G, Liao X, Li Y, Yang H, Wang J, Lam TW, Wang J.** 2012. SOAPdenovo2: an  
448 empirically improved memory-efficient short-read de novo assembler. *Gigascience* **1**, 18.
- 449 **Mammadov J, Buyyarapu R, Guttikonda SK, Parliament K, Abdurakhmonov IY, Kumpatla**  
450 **SP.** 2018. Wild Relatives of Maize, Rice, Cotton, and Soybean: Treasure Troves for Tolerance to  
451 Biotic and Abiotic Stresses. *Front Plant Sci* **9**, 886.
- 452 **Marcais G, Kingsford C.** 2011. A fast, lock-free approach for efficient parallel counting of  
453 occurrences of k-mers. *Bioinformatics* **27**, 764-770.
- 454 **Mendez-Vigo B, Pico FX, Ramiro M, Martinez-Zapater JM, Alonso-Blanco C.** 2011. Altitudinal  
455 and climatic adaptation is mediated by flowering traits and FRI, FLC, and PHYC genes in  
456 *Arabidopsis*. *Plant Physiol* **157**, 1942-1955.
- 457 **Mundt CC.** 2002. Use of multiline cultivars and cultivar mixtures for disease management. *Annu*  
458 *Rev Phytopathol* **40**, 381-410.
- 459 **Navratilova A, Neumann P, Macas J.** 2003. Karyotype analysis of four *Vicia* species using in situ  
460 hybridization with repetitive sequences. *Ann Bot* **91**, 921-926.
- 461 **Nouzova M, Neumann P, Navratilova A, Galbraith DW, Macas J.** 2001. Microarray-based  
462 survey of repetitive genomic sequences in *Vicia* spp. *Plant Mol Biol* **45**, 229-244.
- 463 **Ogata H, Goto S, Sato K, Fujibuchi W, Bono H, Kanehisa M.** 1999. KEGG: Kyoto Encyclopedia  
464 of Genes and Genomes. *Nucleic Acids Res* **27**, 29-34.
- 465 **Pearce SR, Harrison G, Li D, Heslop-Harrison J, Kumar A, Flavell AJ.** 1996. The Ty1-copia  
466 group retrotransposons in *Vicia* species: copy number, sequence heterogeneity and chromosomal  
467 localisation. *Mol Gen Genet* **250**, 305-315.
- 468 **Pertea M, Kim D, Pertea GM, Leek JT, Salzberg SL.** 2016. Transcript-level expression analysis  
469 of RNA-seq experiments with HISAT, StringTie and Ballgown. *Nat Protoc* **11**, 1650-1667.

- 470 **Perteua M, Perteua GM, Antonescu CM, Chang TC, Mendell JT, Salzberg SL.** 2015. StringTie  
471 enables improved reconstruction of a transcriptome from RNA-seq reads. *Nat Biotechnol* **33**,  
472 290-295.
- 473 **Peterson BK, Weber JN, Kay EH, Fisher HS, Hoekstra HE.** 2012. Double digest RADseq: an  
474 inexpensive method for de novo SNP discovery and genotyping in model and non-model species.  
475 *PLoS One* **7**, e37135.
- 476 **Price AL, Jones NC, Pevzner PA.** 2005. De novo identification of repeat families in large genomes.  
477 *Bioinformatics* **21 Suppl 1**, i351-358.
- 478 **Sato S, Nakamura Y, Kaneko T, Asamizu E, Kato T, Nakao M, Sasamoto S, Watanabe A, Ono**  
479 **A, Kawashima K, Fujishiro T, Katoh M, Kohara M, Kishida Y, Minami C, Nakayama S,**  
480 **Nakazaki N, Shimizu Y, Shinpo S, Takahashi C, Wada T, Yamada M, Ohmido N, Hayashi M,**  
481 **Fukui K, Baba T, Nakamichi T, Mori H, Tabata S.** 2008. Genome structure of the legume, *Lotus*  
482 *japonicus*. *DNA Res* **15**, 227-239.
- 483 **Schmieder R, Edwards R.** 2011. Quality control and preprocessing of metagenomic datasets.  
484 *Bioinformatics* **27**, 863-864.
- 485 **Schmutz J, McClean PE, Mamidi S, Wu GA, Cannon SB, Grimwood J, Jenkins J, Shu S, Song**  
486 **Q, Chavarro C, Torres-Torres M, Geffroy V, Moghaddam SM, Gao D, Abernathy B, Barry K,**  
487 **Blair M, Brick MA, Chovatia M, Gepts P, Goodstein DM, Gonzales M, Hellsten U, Hyten DL,**  
488 **Jia G, Kelly JD, Kudrna D, Lee R, Richard MM, Miklas PN, Osorno JM, Rodrigues J,**  
489 **Thareau V, Urrea CA, Wang M, Yu Y, Zhang M, Wing RA, Cregan PB, Rokhsar DS, Jackson**  
490 **SA.** 2014. A reference genome for common bean and genome-wide analysis of dual domestications.  
491 *Nat Genet* **46**, 707-713.
- 492 **Schneider CA, Rasband WS, Eliceiri KW.** 2012. NIH Image to ImageJ: 25 years of image analysis.  
493 *Nat Methods* **9**, 671-675.
- 494 **Shirasawa K, Hirakawa H, Isobe S.** 2016. Analytical workflow of double-digest restriction  
495 site-associated DNA sequencing based on empirical and in silico optimization in tomato. *DNA Res*  
496 **23**, 145-153.
- 497 **Simao FA, Waterhouse RM, Ioannidis P, Kriventseva EV, Zdobnov EM.** 2015. BUSCO:  
498 assessing genome assembly and annotation completeness with single-copy orthologs. *Bioinformatics*  
499 **31**, 3210-3212.
- 500 **Tatusov RL, Fedorova ND, Jackson JD, Jacobs AR, Kiryutin B, Koonin EV, Krylov DM,**  
501 **Mazumder R, Mekhedov SL, Nikolskaya AN, Rao BS, Smirnov S, Sverdlov AV, Vasudevan S,**  
502 **Wolf YI, Yin JJ, Natale DA.** 2003. The COG database: an updated version includes eukaryotes.  
503 *BMC Bioinformatics* **4**, 41.
- 504 **Vaughan DA, Balazs E, Heslop-Harrison JS.** 2007. From crop domestication to  
505 super-domestication. *Ann Bot* **100**, 893-901.
- 506 **Young ND, Debelle F, Oldroyd GE, Geurts R, Cannon SB, Udvardi MK, Benedito VA, Mayer**  
507 **KF, Gouzy J, Schoof H, Van de Peer Y, Proost S, Cook DR, Meyers BC, Spannagl M, Cheung**

508 **F, De Mita S, Krishnakumar V, Gundlach H, Zhou S, Mudge J, Bharti AK, Murray JD,**  
509 **Naoumkina MA, Rosen B, Silverstein KA, Tang H, Rombauts S, Zhao PX, Zhou P, Barbe V,**  
510 **Bardou P, Bechner M, Bellec A, Berger A, Berges H, Bidwell S, Bisseling T, Choisine N,**  
511 **Couloux A, Denny R, Deshpande S, Dai X, Doyle JJ, Dudez AM, Farmer AD, Fouteau S,**  
512 **Franken C, Gibelin C, Gish J, Goldstein S, Gonzalez AJ, Green PJ, Hallab A, Hartog M, Hua**  
513 **A, Humphray SJ, Jeong DH, Jing Y, Jocker A, Kenton SM, Kim DJ, Klee K, Lai H, Lang C,**  
514 **Lin S, Macmil SL, Magdelenat G, Matthews L, McCorrison J, Monaghan EL, Mun JH, Najar**  
515 **FZ, Nicholson C, Noirot C, O'Bleness M, Paule CR, Poulain J, Prion F, Qin B, Qu C, Retzel EF,**  
516 **Riddle C, Sallet E, Samain S, Samson N, Sanders I, Saurat O, Scarpelli C, Schiex T, Segurens**  
517 **B, Severin AJ, Sherrier DJ, Shi R, Sims S, Singer SR, Sinharoy S, Sterck L, Viollet A, Wang**  
518 **BB, Wang K, Wang M, Wang X, Warfsmann J, Weissenbach J, White DD, White JD, Wiley**  
519 **GB, Wincker P, Xing Y, Yang L, Yao Z, Ying F, Zhai J, Zhou L, Zuber A, Denarie J, Dixon**  
520 **RA, May GD, Schwartz DC, Rogers J, Quetier F, Town CD, Roe BA. 2011. The Medicago**  
521 **genome provides insight into the evolution of rhizobial symbioses. Nature 480, 520-524.**  
522 **Zhu Y, Chen H, Fan J, Wang Y, Li Y, Chen J, Fan J, Yang S, Hu L, Leung H, Mew TW, Teng**  
523 **PS, Wang Z, Mundt CC. 2000. Genetic diversity and disease control in rice. Nature 406, 718-722.**  
524

525 **Table 1** Relative chromosome length of *Vicia sativa*, KSR5

| Chromosome | Relative length (%) | S.d.* |
|------------|---------------------|-------|
| I          | 22.3                | 0.7   |
| II         | 21.0                | 0.7   |
| III        | 18.6                | 1.3   |
| IV         | 16.1                | 1.6   |
| V          | 10.3                | 0.7   |
| VI         | 9.1                 | 0.6   |
| VII        | 2.7                 | 1.0   |

526 \*Standard deviation (n = 10)

527

528 **Table 2** Assembly statistics of the common vetch (*Vicia sativa*) genome assembly VSA\_r1.0

|                                | VSA_r1.0      |
|--------------------------------|---------------|
| Number of scaffolds            | 54,083        |
| Assembly size (bp)             | 1,541,180,487 |
| Scaffold N50 (bp)              | 90,105        |
| Maximal scaffold (bp)          | 871,438       |
| Number of gaps                 | 513,235       |
| Gap size (bp)                  | 501,483,283   |
| Complete and single-copy BUSCO | 77.5%         |
| Complete and duplicated BUSCO  | 16.6%         |
| Fragmented BUSCO               | 2.9%          |
| Missing BUSCO                  | 2.9%          |
| Number of genes predicted      | 31,146        |

529

530 **Table 3** Repeat sequences in the VSA\_r1.0 assembly

| Repeat type               | Length occupied (bp) | %           |
|---------------------------|----------------------|-------------|
| SINEs <sup>b</sup>        | 85,029               | 0.0         |
| LINEs <sup>b</sup>        | 10,462,622           | 0.7         |
| LTR elements <sup>b</sup> | 200,723,246          | 13.0        |
| DNA elements              | 15,595,575           | 1.0         |
| Helitrons                 | 1,469,970            | 0.1         |
| Satellites                | 17,496,670           | 1.1         |
| Simple repeats            | 17,496,670           | 1.1         |
| Low complexity            | 4,468,370            | 0.3         |
| Novel repeats             | 531,016,543          | 34.5        |
| <b>Total<sup>a</sup></b>  | <b>782,834,201</b>   | <b>50.8</b> |

531 <sup>a</sup>Non-redundant sequence length of the repeats overlapping in the genome.

532 <sup>b</sup>SINEs: short interspersed nuclear elements; LINEs: long interspersed nuclear elements; and LTR:

533 long terminal repeat.

534

535 **Table 4** Cluster, heterozygosity, and nucleotide diversity calculated from SNPs of 12 common vetch natural populations in Japan

| Population | Sampling location <sup>a</sup> | Number of individuals | Number of SNPs | Number of clusters (K) | Expected heterozygosity (He) | Observed heterozygosity (Ho) | Nucleotide divergency ( $\pi$ ) |
|------------|--------------------------------|-----------------------|----------------|------------------------|------------------------------|------------------------------|---------------------------------|
| ABK        | Abiko, Chiba, Japan            | 102                   | 10,040         | 4                      | 0.313                        | 0.189                        | 0.314                           |
| FKO        | Fukuoka, Japan                 | 97                    | 9,795          | 7                      | 0.318                        | 0.057                        | 0.319                           |
| KGS        | Kagoshima, Japan               | 109                   | 5,189          | 8                      | 0.330                        | 0.106                        | 0.330                           |
| KMT        | Kimitsu, Chiba, Japan          | 95                    | 7,256          | 9                      | 0.336                        | 0.087                        | 0.336                           |
| KSR        | Kisarazu, Chiba, Japan         | 88                    | 6,450          | 4                      | 0.340                        | 0.111                        | 0.340                           |
| KYT        | Kyoto, Japan                   | 104                   | 8,974          | 8                      | 0.339                        | 0.114                        | 0.338                           |
| KZS        | Kazusa, Chiba, Japan           | 97                    | 7,243          | 4                      | 0.334                        | 0.147                        | 0.334                           |
| NGT        | Niigata, Japan                 | 100                   | 6,658          | 3                      | 0.247                        | 0.085                        | 0.248                           |
| NGY        | Nagoya, Aichi, Japan           | 102                   | 6,891          | 5                      | 0.335                        | 0.140                        | 0.335                           |
| OKY        | Okayama, Japan                 | 99                    | 9,649          | 11                     | 0.337                        | 0.085                        | 0.336                           |
| SDI        | Sendai, Miyagi, Japan          | 100                   | 4,709          | 2                      | 0.264                        | 0.161                        | 0.262                           |
| TNS        | Tanashi, Tokyo, Japan          | 150                   | 7,939          | 10                     | 0.326                        | 0.153                        | 0.325                           |

536 <sup>a</sup>Geographical positions are indicated in Figure 1 and Supplementary Table S1.



537 **Figure Legends**

538 **Figure 1** Sampling locations in Japan.

539 Three-letter codes indicate sampling locations in Japan: ABK: Abiko, Chiba; FKO: Fukuoka;

540 KGS: Kagoshima; KMT: Kimitsu, Chiba; KSR: Kisarazu, Chiba; KYT: Kyoto; KZS: Kazusa,

541 Chiba; NGT: Niigata; NGY: Nagoya, Aichi; OKY: Okayama; SDI: Sendai, Miyagi; and

542 TNS: Tanashi, Tokyo.

543 **Figure 2** Chromosomes of the common vetch KSR5.

544 Roman numerals indicate chromosome pairs, which order is based on chromosome length (I

545 to VII). Bar = 5  $\mu$ m.

546 **Figure 3** Genome size estimation for *Vicia sativa* with the distribution of the number of

547 distinct  $k$ -mers ( $k=17$ ) with the given multiplicity values.

548 **Figure 4** Venn diagram showing numbers of gene clusters in *Vicia sativa* and four additional

549 Fabaceae species.

550 **Figure 5** Principal component analysis of 12 natural populations of *Vicia sativa* from Japan.

551 **Figure 6** Nucleotide diversity ( $\pi$ ) of the SNP module ‘cyan’ ( $n=190$ ) across 12 natural

552 populations of *Vicia sativa* in Japan.

553 Three-letter codes indicate sampling locations in Japan: ABK: Abiko, Chiba; FKO: Fukuoka;

554 KGS: Kagoshima; KMT: Kimitsu, Chiba; KSR: Kisarazu, Chiba; KYT: Kyoto; KZS: Kazusa,

555 Chiba; NGT: Niigata; NGY: Nagoya, Aichi; OKY: Okayama; SDI: Sendai, Miyagi; and

556 TNS: Tanashi, Tokyo.

557

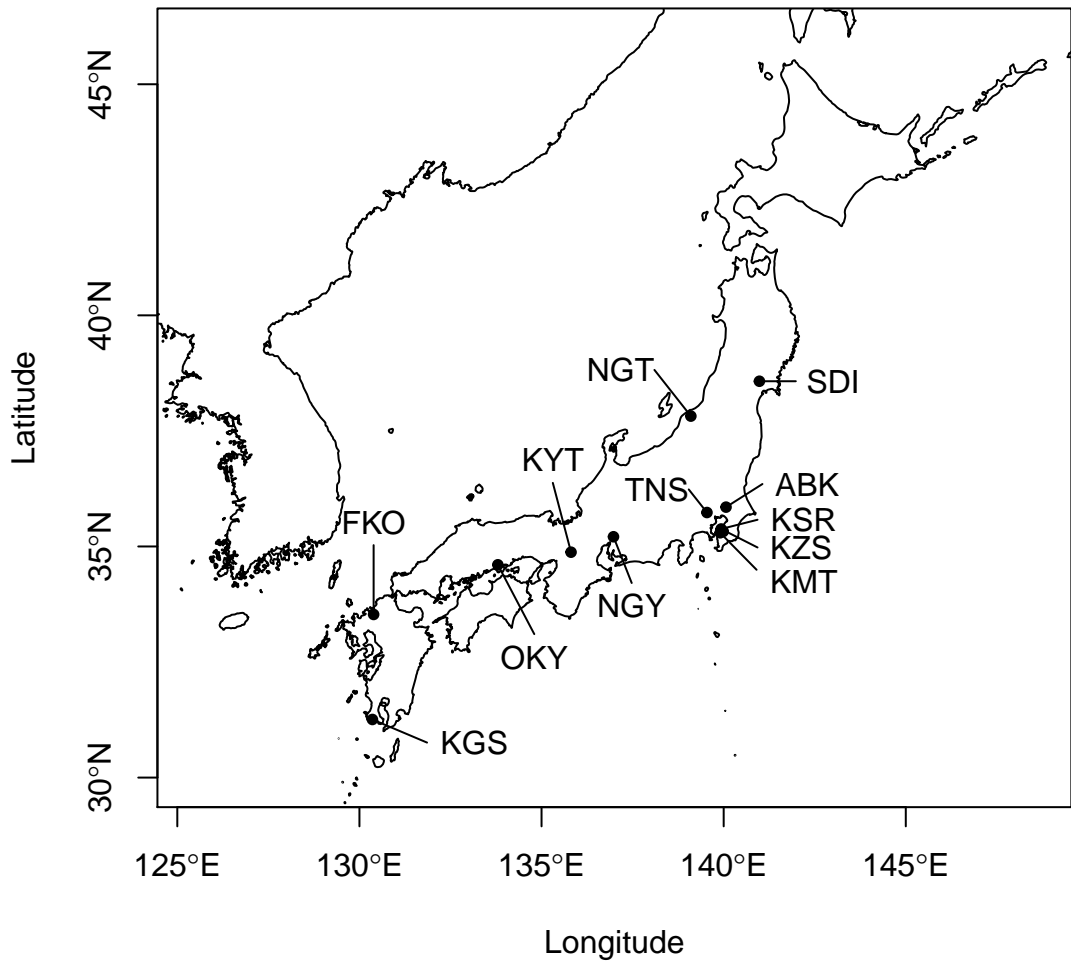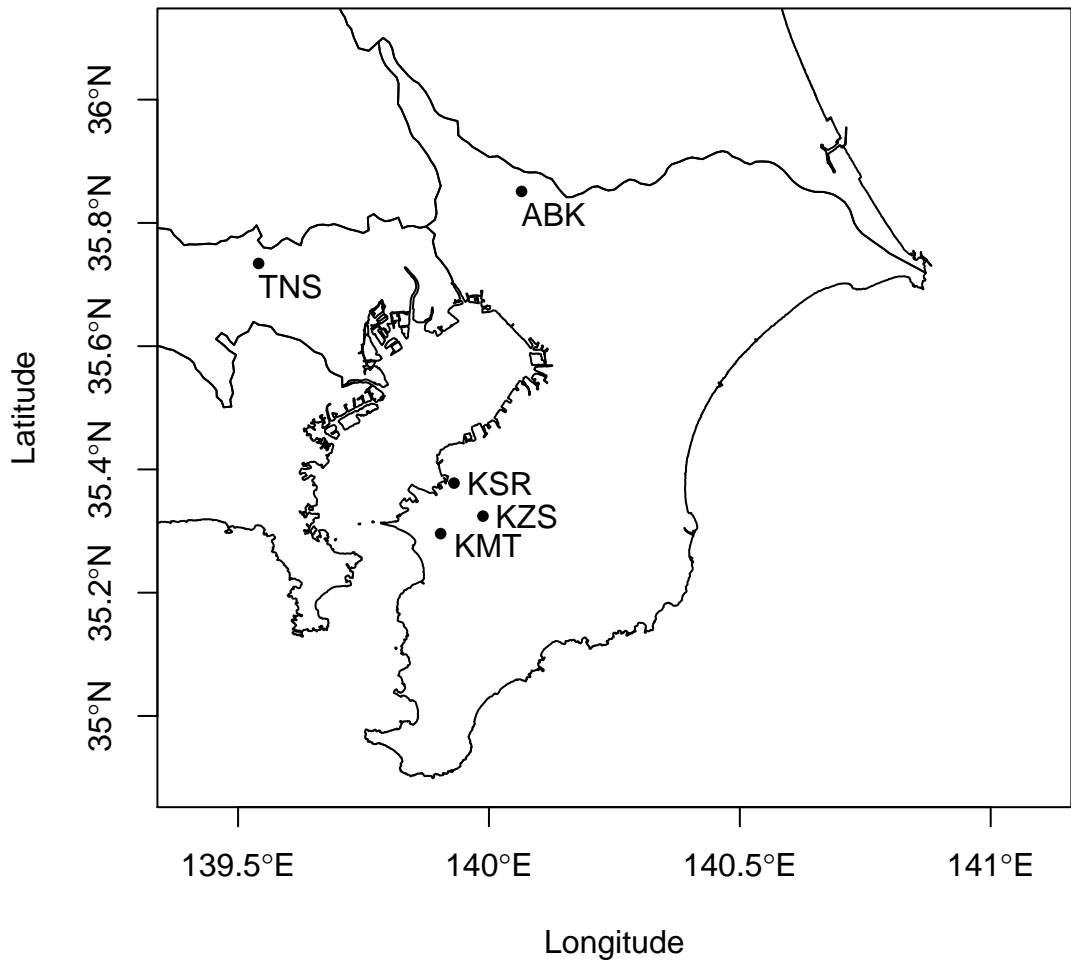

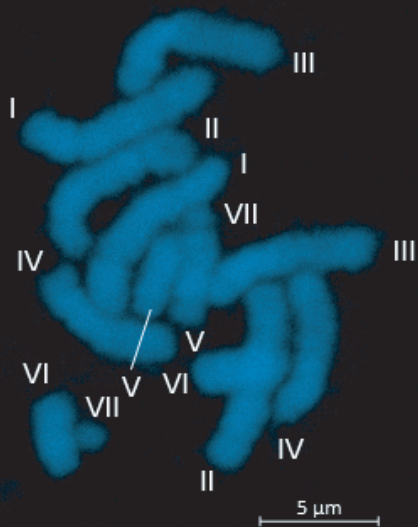

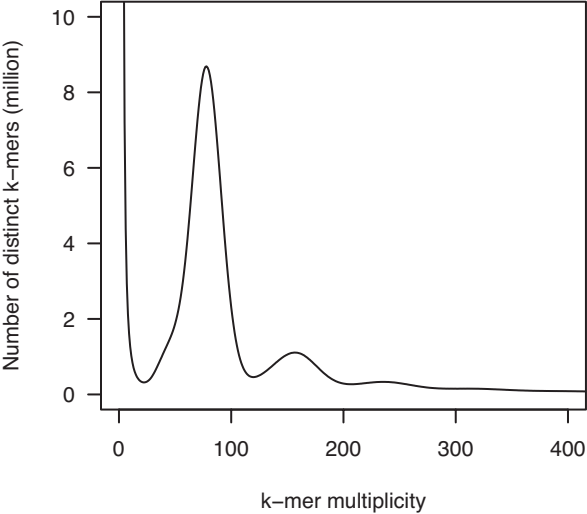

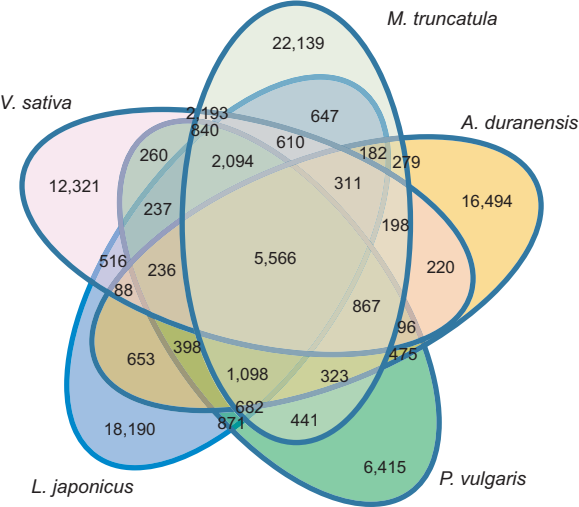

**ABK**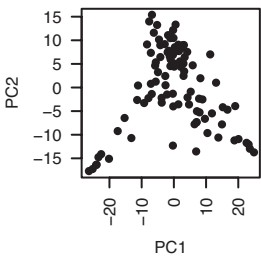**FKO**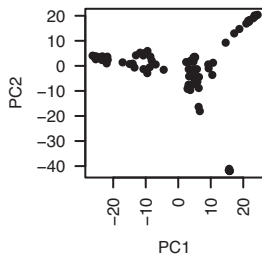**KGS**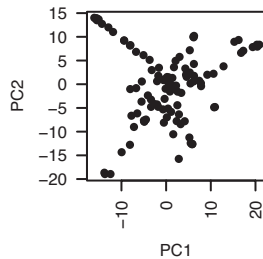**KMT**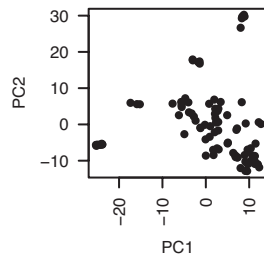**KSR**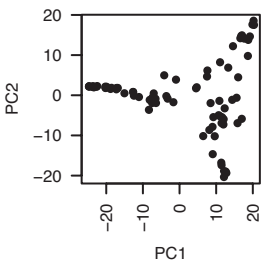**KYT**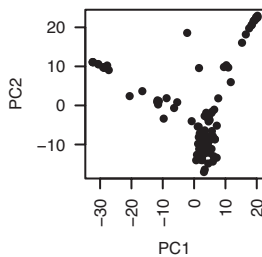**KZS**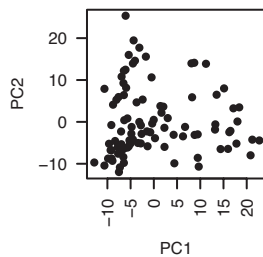**NGT**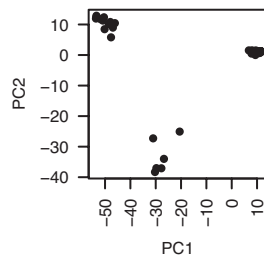**NGY**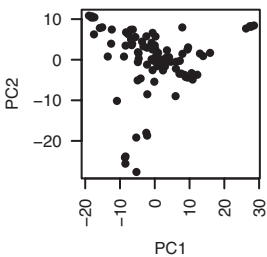**OKY**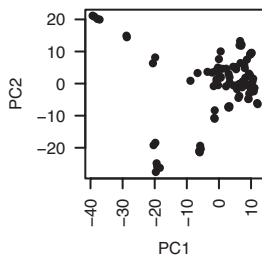**SDI**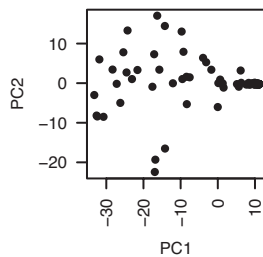**TNS**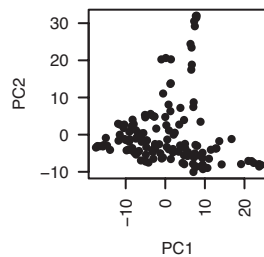

Pi

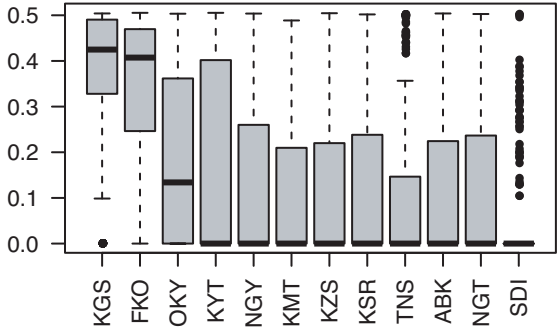

Source: https://www.biorxiv.org/content/10.1101/2021.03.09.434686v1.full.pdf
